# Supplementary material for: Forecasts of weekly incident and cumulative COVID-19 mortality in the United States: A comparison of combining methods
Source: bioRxiv or medRxiv preprint supplement (doi:10.1101/2021.07.11.21260318), 2021-09-18
Supplement: Supplementary file [file media-3.pdf]

**S2 Table 1. For incident COVID-19 mortality, scores in the 39 week out-of-sample period for each horizon**

| Method               | Mean interval score |                    |                   |                  |                   | Mean absolute error |                   |                  |                  |                  |
|----------------------|---------------------|--------------------|-------------------|------------------|-------------------|---------------------|-------------------|------------------|------------------|------------------|
|                      | All                 | U.S.               | High              | Med              | Low               | All                 | U.S.              | High             | Med              | Low              |
| <i>1 week ahead</i>  |                     |                    |                   |                  |                   |                     |                   |                  |                  |                  |
| Mean                 | 687                 | 6877               | 1224              | 386              | 88                | 68                  | 1202              | 92               | 34               | 11               |
| Median               | 618                 | 8679               | 914               | 370              | 95                | 64                  | 1152              | 86               | 33               | 11               |
| Ensemble             | 621                 | 8541               | 927               | 374              | 95                | 65                  | 1181              | 85               | 33               | 11               |
| Sym trim             | 638                 | 7222               | 1075              | 364 <sup>†</sup> | 88 <sup>§</sup>   | 65 <sup>†</sup>     | 1152              | 87               | 32 <sup>*†</sup> | 11               |
| Interior trim        | 647                 | 6999               | 1125              | 361 <sup>*</sup> | 81 <sup>*†§</sup> | 68                  | 1223              | 91               | 33               | 11               |
| Inv score            | 594 <sup>†</sup>    | 6506               | 988 <sup>†</sup>  | 364 <sup>†</sup> | 84 <sup>†§</sup>  | 66 <sup>†</sup>     | 1159              | 89               | 33               | 11               |
| Inv score tuning     | 533 <sup>†</sup>    | 6245               | 807               | 370              | 87 <sup>§</sup>   | 62 <sup>*†</sup>    | 1032 <sup>*</sup> | 85 <sup>†</sup>  | 34 <sup>†</sup>  | 11 <sup>†</sup>  |
| Model 21             | 527 <sup>*†</sup>   | 6005 <sup>*</sup>  | 770 <sup>*§</sup> | 394              | 94                | 62 <sup>*</sup>     | 1039              | 84 <sup>*</sup>  | 33               | 10 <sup>*</sup>  |
| Model 33             | 710                 | 8352               | 1121              | 449              | 112               | 66                  | 1081              | 93               | 34               | 10 <sup>*</sup>  |
| <i>2 weeks ahead</i> |                     |                    |                   |                  |                   |                     |                   |                  |                  |                  |
| Mean                 | 892                 | 9345               | 1644              | 436              | 97                | 99                  | 1486              | 162              | 40               | 13               |
| Median               | 705                 | 9795               | 1072              | 407 <sup>*</sup> | 100               | 76                  | 1385              | 102 <sup>*</sup> | 38 <sup>*†</sup> | 12 <sup>*†</sup> |
| Ensemble             | 713                 | 9739               | 1087              | 418              | 101               | 77                  | 1426              | 102 <sup>*</sup> | 38 <sup>*†</sup> | 12 <sup>*</sup>  |
| Sym trim             | 841                 | 9761               | 1477              | 424              | 98                | 94 <sup>†</sup>     | 1390              | 156              | 38 <sup>*†</sup> | 12 <sup>*†</sup> |
| Interior trim        | 913                 | 9322               | 1743              | 412              | 91 <sup>*</sup>   | 99                  | 1514              | 161              | 39               | 13               |
| Inv score            | 742 <sup>†</sup>    | 8069               | 1285 <sup>†</sup> | 418              | 91 <sup>*†</sup>  | 96                  | 1385 <sup>†</sup> | 161              | 39               | 12 <sup>*</sup>  |
| Inv score tuning     | 635 <sup>*†</sup>   | 7693 <sup>*</sup>  | 958               | 434              | 96                | 75                  | 1162 <sup>†</sup> | 108              | 40               | 12 <sup>*</sup>  |
| Model 21             | 645                 | 8660               | 888 <sup>*</sup>  | 473              | 102               | 74                  | 1237              | 103              | 40               | 12 <sup>*</sup>  |
| Model 33             | 720                 | 9218               | 1088              | 454              | 120               | 73                  | 1155 <sup>*</sup> | 105              | 38 <sup>*</sup>  | 12 <sup>*</sup>  |
| <i>3 weeks ahead</i> |                     |                    |                   |                  |                   |                     |                   |                  |                  |                  |
| Mean                 | 979                 | 9660               | 1863              | 459              | 105               | 107                 | 1809              | 163              | 46               | 14               |
| Median               | 799                 | 12427              | 1160              | 446              | 107               | 92                  | 1726              | 124              | 43 <sup>*†</sup> | 14               |
| Ensemble             | 813                 | 11915              | 1217              | 459              | 108               | 92                  | 1708              | 124              | 44               | 14               |
| Sym trim             | 953                 | 11156              | 1694              | 456              | 110               | 103                 | 1722              | 157              | 44               | 14               |
| Interior trim        | 942                 | 9921               | 1751              | 447              | 100 <sup>*</sup>  | 107                 | 1825              | 162              | 45               | 14               |
| Inv score            | 815 <sup>†</sup>    | 8952               | 1432 <sup>†</sup> | 436 <sup>*</sup> | 100 <sup>*†</sup> | 103 <sup>†</sup>    | 1666 <sup>†</sup> | 159              | 45               | 14 <sup>†</sup>  |
| Inv score tuning     | 686 <sup>*</sup>    | 8912               | 1018              | 452              | 105               | 88                  | 1451              | 124              | 46               | 14               |
| Model 21             | 806                 | 13889              | 988 <sup>*</sup>  | 548              | 113               | 90                  | 1632              | 119 <sup>*</sup> | 46               | 13 <sup>*</sup>  |
| Model 33             | 698                 | 6844 <sup>*</sup>  | 1097              | 495              | 140               | 80 <sup>*</sup>     | 1191 <sup>*</sup> | 119 <sup>*</sup> | 43 <sup>*</sup>  | 14               |
| <i>4 weeks ahead</i> |                     |                    |                   |                  |                   |                     |                   |                  |                  |                  |
| Mean                 | 1044                | 13315              | 1792              | 491              | 126               | 121                 | 2347              | 165              | 52               | 16               |
| Median               | 989                 | 14055              | 1543              | 518              | 138               | 112                 | 2263              | 143              | 49 <sup>*</sup>  | 15               |
| Ensemble             | 1029                | 14509              | 1611              | 539              | 143               | 111                 | 2204              | 145              | 50               | 15               |
| Sym trim             | 1077                | 13641              | 1814              | 542              | 138               | 118                 | 2263              | 163              | 51               | 15               |
| Interior trim        | 1076                | 13634              | 1879              | 495              | 116 <sup>*†</sup> | 121                 | 2353              | 165              | 52               | 16               |
| Inv score            | 929 <sup>†</sup>    | 12993              | 1478 <sup>†</sup> | 481 <sup>*</sup> | 117               | 116 <sup>†</sup>    | 2130 <sup>†</sup> | 162              | 51               | 16               |
| Inv score tuning     | 854 <sup>*§</sup>   | 12906              | 1216              | 508              | 128               | 104 <sup>†</sup>    | 1777              | 145              | 53               | 15               |
| Model 21             | 939                 | 16141              | 1145 <sup>*</sup> | 632              | 146               | 106                 | 1931              | 141              | 55               | 14 <sup>*</sup>  |
| Model 33             | 863                 | 10312 <sup>*</sup> | 1249              | 598              | 185               | 99 <sup>*</sup>     | 1680 <sup>*</sup> | 137 <sup>*</sup> | 51               | 17               |

\*For each horizon, best method for each column; <sup>†</sup>score is significantly lower than the mean combination; <sup>§</sup> score is significantly lower than the median combination. Lower values are better.
