# Supplementary material for: Forecasts of weekly incident and cumulative COVID-19 mortality in the United States: A comparison of combining methods
Source: bioRxiv or medRxiv preprint supplement (doi:10.1101/2021.07.11.21260318), 2021-09-18
Supplement: Supplementary file [file media-4.pdf]

**S3 Table. For cumulative COVID-19 mortality, scores in the 39 week out-of-sample period for each horizon**

| Method               | Mean interval score |                     |                    |                   |                   | Mean absolute error |                    |                  |                  |                 |
|----------------------|---------------------|---------------------|--------------------|-------------------|-------------------|---------------------|--------------------|------------------|------------------|-----------------|
|                      | All                 | U.S.                | High               | Med               | Low               | All                 | U.S.               | High             | Med              | Low             |
| <i>1 week ahead</i>  |                     |                     |                    |                   |                   |                     |                    |                  |                  |                 |
| Mean                 | 3319                | 62108               | 5666               | 585               | 249               | 160                 | 3541               | 223              | 40               | 17              |
| Median               | 3123                | 57217               | 5473               | 451 <sup>†</sup>  | 263               | 144 <sup>†</sup>    | 3036               | 209 <sup>†</sup> | 36 <sup>†</sup>  | 16 <sup>†</sup> |
| Ensemble             | 3077                | 54979               | 5461               | 453 <sup>†</sup>  | 265               | 143 <sup>†§</sup>   | 2979               | 209 <sup>†</sup> | 36 <sup>†</sup>  | 16 <sup>†</sup> |
| Sym trim             | 3277                | 63747               | 5560               | 483 <sup>†</sup>  | 231 <sup>§</sup>  | 148                 | 3190               | 213              | 37 <sup>†</sup>  | 16 <sup>†</sup> |
| Interior trim        | 2204 <sup>†§</sup>  | 33641 <sup>†§</sup> | 4136 <sup>†§</sup> | 491 <sup>†</sup>  | 136 <sup>†§</sup> | 156                 | 3402               | 220              | 39               | 17 <sup>†</sup> |
| Previous best        | 2559 <sup>†§</sup>  | 31436 <sup>*§</sup> | 5282               | 532               | 165 <sup>†§</sup> | 147                 | 2767 <sup>*†</sup> | 228              | 44               | 17              |
| Inv score            | 3195                | 55789 <sup>†</sup>  | 5681               | 612               | 199 <sup>†§</sup> | 159                 | 3548               | 222              | 40               | 16 <sup>†</sup> |
| Inv score tuning     | 2736 <sup>†§</sup>  | 39628 <sup>§</sup>  | 5290 <sup>†</sup>  | 574               | 175 <sup>†§</sup> | 158                 | 3520               | 219              | 40               | 16 <sup>†</sup> |
| Model 33             | 3271                | 62685               | 5503               | 540               | 276               | 142 <sup>*†</sup>   | 2858               | 213              | 37               | 16 <sup>*</sup> |
| <i>2 weeks ahead</i> |                     |                     |                    |                   |                   |                     |                    |                  |                  |                 |
| Mean                 | 3045                | 38620               | 6102               | 720               | 219 <sup>†</sup>  | 223                 | 4031               | 357              | 64               | 24 <sup>*</sup> |
| Median               | 3303                | 47609               | 6284               | 737               | 282               | 200                 | 3879               | 297              | 64               | 24 <sup>*</sup> |
| Ensemble             | 3231                | 44870               | 6220               | 740               | 285               | 224                 | 4037               | 359              | 64               | 24 <sup>*</sup> |
| Sym trim             | 3105                | 39643               | 6213               | 728               | 223 <sup>§</sup>  | 202                 | 3983               | 297              | 63 <sup>*</sup>  | 24 <sup>*</sup> |
| Interior trim        | 3491                | 32197               | 7897               | 729               | 158 <sup>†§</sup> | 224                 | 4037               | 359              | 64               | 24 <sup>*</sup> |
| Previous best        | 3063                | 40956               | 5797               | 928               | 235               | 204                 | 3354 <sup>*</sup>  | 321              | 81               | 26              |
| Inv score            | 2842 <sup>†§</sup>  | 31725 <sup>*</sup>  | 5927 <sup>†</sup>  | 713 <sup>*</sup>  | 188 <sup>†§</sup> | 217                 | 3898 <sup>†</sup>  | 347              | 64               | 24 <sup>†</sup> |
| Inv score tuning     | 2756 <sup>†§</sup>  | 32620               | 5601 <sup>*§</sup> | 738               | 171 <sup>§</sup>  | 193 <sup>*</sup>    | 3651               | 289 <sup>*</sup> | 64               | 24 <sup>*</sup> |
| Model 33             | 3332                | 48704               | 6166               | 856               | 305               | 197                 | 3601               | 300              | 67               | 24 <sup>*</sup> |
| <i>3 weeks ahead</i> |                     |                     |                    |                   |                   |                     |                    |                  |                  |                 |
| Mean                 | 3594                | 43109               | 7178               | 1022              | 257 <sup>§</sup>  | 303                 | 5022               | 497              | 100              | 33 <sup>*</sup> |
| Median               | 3795                | 52918               | 7100               | 1077              | 318               | 265                 | 4769               | 400              | 98 <sup>*</sup>  | 34              |
| Ensemble             | 3655                | 46027               | 7070               | 1075              | 329               | 263                 | 4674               | 397              | 98 <sup>*</sup>  | 34              |
| Sym trim             | 3777                | 48037               | 7423               | 1041              | 263 <sup>§</sup>  | 270                 | 4996               | 399              | 98 <sup>*</sup>  | 33 <sup>*</sup> |
| Interior trim        | 4503                | 36011               | 10377              | 1050              | 230 <sup>§</sup>  | 305                 | 5058               | 500              | 101              | 34              |
| Previous best        | 3766                | 53485               | 6604               | 1425              | 344               | 277                 | 4129 <sup>*</sup>  | 442              | 127              | 37              |
| Inv score            | 3349 <sup>†</sup>   | 35893               | 6899 <sup>†</sup>  | 1012 <sup>*</sup> | 221 <sup>†§</sup> | 292                 | 4763 <sup>†</sup>  | 480              | 100              | 33 <sup>†</sup> |
| Inv score tuning     | 3177 <sup>*</sup>   | 39846               | 6090 <sup>*§</sup> | 1052              | 232 <sup>§</sup>  | 255 <sup>*</sup>    | 4378               | 389 <sup>*</sup> | 99               | 33 <sup>*</sup> |
| Model 33             | 3442                | 35365 <sup>*</sup>  | 6859               | 1229              | 361               | 257                 | 4220               | 403              | 102              | 34              |
| <i>4 weeks ahead</i> |                     |                     |                    |                   |                   |                     |                    |                  |                  |                 |
| Mean                 | 4158                | 50151               | 8096               | 1373              | 300 <sup>§</sup>  | 395                 | 6422               | 642              | 143              | 44              |
| Median               | 4580                | 66996               | 8219               | 1471              | 379               | 350                 | 6070               | 530              | 140 <sup>*</sup> | 44              |
| Ensemble             | 4387                | 56047               | 8235               | 1495              | 393               | 348                 | 6016               | 526              | 140 <sup>*</sup> | 45              |
| Sym trim             | 4526                | 58825               | 8629               | 1444              | 312 <sup>§</sup>  | 355                 | 6387               | 527              | 140 <sup>*</sup> | 44 <sup>*</sup> |
| Interior trim        | 5335                | 42720               | 12085              | 1413              | 308               | 398                 | 6503               | 647              | 144              | 44              |
| Previous best        | 4734                | 70708               | 7799               | 2053              | 470               | 381                 | 5654               | 600              | 183              | 50              |
| Inv score            | 3799 <sup>†</sup>   | 38510               | 7736 <sup>†</sup>  | 1345 <sup>*</sup> | 275 <sup>†§</sup> | 381                 | 6095 <sup>†</sup>  | 619              | 143              | 43 <sup>†</sup> |
| Inv score tuning     | 3731 <sup>*</sup>   | 50936               | 6690 <sup>*§</sup> | 1428              | 298 <sup>§</sup>  | 337                 | 5617               | 514 <sup>*</sup> | 142              | 44              |
| Model 33             | 3781                | 30433               | 7680               | 1646              | 450               | 328 <sup>*</sup>    | 4963 <sup>*</sup>  | 522              | 145              | 46              |

\*For each horizon, best method for each column; <sup>†</sup>score is significantly lower than the mean combination; <sup>§</sup> score is significantly lower than the median combination. Lower values are better.
