# Supplementary material for: Forecasts of weekly incident and cumulative COVID-19 mortality in the United States: A comparison of combining methods
Source: bioRxiv or medRxiv preprint supplement (doi:10.1101/2021.07.11.21260318), 2021-09-18
Supplement: Supplementary file [file media-5.pdf]

**S4 Table. For incident COVID-19 mortality, scores for each 13 week period.**

| Method               | Mean interval score |        |       |      |      | Mean absolute error |       |      |     |     |
|----------------------|---------------------|--------|-------|------|------|---------------------|-------|------|-----|-----|
|                      | All                 | U.S.   | High  | Med  | Low  | All                 | U.S.  | High | Med | Low |
| <i>First period</i>  |                     |        |       |      |      |                     |       |      |     |     |
| Mean                 | 503                 | 5992*  | 978   | 166  | 42   | 56                  | 1064  | 81   | 23  | 6   |
| Median               | 419*                | 6297   | 728   | 150* | 34*  | 48*                 | 821   | 73*  | 22* | 5*  |
| Model 1              | 450                 | 7226   | 703*  | 199  | 48   | 52                  | 772*  | 84   | 23  | 6   |
| <i>Second period</i> |                     |        |       |      |      |                     |       |      |     |     |
| Mean                 | 452                 | 7683   | 668   | 206* | 57   | 53                  | 1004  | 68   | 27* | 9   |
| Median               | 536                 | 8361   | 791   | 278  | 79   | 55                  | 1020  | 70   | 28  | 10  |
| Ensemble             | 547                 | 8570   | 803   | 286  | 79   | 55                  | 1006  | 71   | 28  | 10  |
| Sym trim             | 522                 | 8756   | 745   | 267  | 71   | 54                  | 1020  | 69   | 28  | 9   |
| Exterior trim        | 586                 | 11146  | 771   | 289  | 77   | NA                  | NA    | NA   | NA  | NA  |
| Interior trim        | 468                 | 7683   | 717   | 208  | 55   | NA                  | NA    | NA   | NA  | NA  |
| Previous best        | 456                 | 5649   | 638   | 313  | 112  | 53                  | 826   | 74   | 30  | 10  |
| Inv score            | 416                 | 7147   | 593   | 207  | 53*  | 50                  | 876   | 66   | 27* | 9   |
| Inv score tuning     | 416                 | 7147   | 593   | 207  | 53*  | 50                  | 876   | 66   | 27* | 9   |
| Model 1              | 373*                | 6075   | 465*  | 251  | 67   | 44*                 | 593   | 62*  | 29  | 9   |
| Model 33             | 463                 | 5505*  | 718   | 301  | 72   | 46                  | 566*  | 71   | 28  | 8*  |
| <i>Third period</i>  |                     |        |       |      |      |                     |       |      |     |     |
| Mean                 | 1148                | 14161  | 2156  | 391  | 132  | 143                 | 2874  | 189  | 60  | 20  |
| Median               | 1168                | 18290  | 1956  | 405  | 135  | 143                 | 2819  | 193  | 59* | 20  |
| Ensemble             | 1203                | 17663  | 2066  | 434  | 142  | 143                 | 2787  | 194  | 59* | 20  |
| Sym trim             | 1216                | 15104  | 2290  | 399  | 141  | 144                 | 2819  | 195  | 59* | 20  |
| Exterior trim        | 1325                | 18193  | 2413  | 417  | 152  | NA                  | NA    | NA   | NA  | NA  |
| Interior trim        | 1204                | 14325  | 2341  | 377  | 122* | NA                  | NA    | NA   | NA  | NA  |
| Previous best        | 1307                | 21529  | 1903  | 671  | 158  | 167                 | 3436  | 214  | 70  | 26  |
| Inv score            | 1029                | 12431  | 1914  | 377* | 125  | 139                 | 2685  | 187  | 60  | 20  |
| Inv score tuning     | 838*                | 11675* | 1343* | 396  | 139  | 128                 | 2140  | 183  | 61  | 20  |
| Model 1              | 1155                | 21363  | 1520  | 613  | 142  | 145                 | 2857  | 193  | 64  | 18* |
| Model 33             | 1051                | 14483  | 1634  | 530  | 198  | 121*                | 1924* | 179* | 60  | 20  |
| <i>Fourth period</i> |                     |        |       |      |      |                     |       |      |     |     |
| Mean                 | 1125                | 7176   | 2125  | 769  | 124  | 99                  | 1181  | 183  | 41  | 10  |
| Median               | 595                 | 6391   | 682   | 646  | 116  | 56                  | 953   | 72   | 34* | 9*  |
| Ensemble             | 594*                | 6624   | 668*  | 645* | 114* | 57                  | 1001  | 71*  | 34* | 9*  |
| Sym trim             | 890                 | 6968   | 1499  | 701  | 114* | 85                  | 953   | 160  | 35  | 9*  |
| Exterior trim        | 1078                | 7176   | 1987  | 765  | 124  | NA                  | NA    | NA   | NA  | NA  |
| Interior trim        | 1022                | 7552   | 1828  | 739  | 116  | NA                  | NA    | NA   | NA  | NA  |
| Previous best        | 856                 | 7529   | 1076  | 965  | 133  | 74                  | 1315  | 96   | 42  | 10  |
| Inv score            | 875                 | 7551   | 1389  | 726  | 118  | 96                  | 1131  | 178  | 40  | 10  |
| Inv score tuning     | 782                 | 7768   | 1055  | 758  | 121  | 66                  | 994   | 92   | 40  | 10  |
| Model 1              | 638                 | 5108*  | 828   | 690  | 133  | 55*                 | 829*  | 75   | 36  | 10  |
| Model 33             | 722                 | 5782   | 1036  | 686  | 146  | 70                  | 1363  | 87   | 37  | 11  |

\* For each period, best method for each column. Lower values are better.
