# Supplementary material for: Forecasts of weekly incident and cumulative COVID-19 mortality in the United States: A comparison of combining methods
Source: bioRxiv or medRxiv preprint supplement (doi:10.1101/2021.07.11.21260318), 2021-09-18
Supplement: Supplementary file [file media-6.pdf]

**S5 Table. For cumulative COVID-19 mortality, scores for each 13 week period.**

| Method               | Mean interval score |        |       |       |      | Mean absolute error |       |      |      |     |
|----------------------|---------------------|--------|-------|-------|------|---------------------|-------|------|------|-----|
|                      | All                 | U.S.   | High  | Med   | Low  | All                 | U.S.  | High | Med  | Low |
| <i>First period</i>  |                     |        |       |       |      |                     |       |      |      |     |
| Mean                 | 1568*               | 14137  | 3516* | 301   | 148  | 140*                | 1863* | 258  | 46   | 15  |
| Median               | 1811                | 14288  | 4268  | 275   | 156  | 144                 | 2318  | 250  | 42*  | 13* |
| Model 1              | 1686                | 12850* | 3992  | 267*  | 141* | 140*                | 2034  | 252* | 43*  | 14* |
| <i>Second period</i> |                     |        |       |       |      |                     |       |      |      |     |
| Mean                 | 1099                | 15757  | 1813  | 505   | 116  | 126                 | 2541  | 162  | 56   | 18  |
| Median               | 1296                | 17304  | 2136  | 653   | 156  | 128                 | 2508  | 167  | 59   | 19  |
| Ensemble             | 1314                | 17665  | 2163  | 658   | 159  | 127                 | 2425  | 166  | 59   | 19  |
| Sym trim             | 1331                | 23368  | 1990  | 570   | 137  | 127                 | 2530  | 163  | 57   | 19  |
| Exterior trim        | 1444                | 26815  | 2081  | 613   | 146  | NA                  | NA    | NA   | NA   | NA  |
| Interior trim        | 937*                | 15757  | 1338* | 486*  | 115  | NA                  | NA    | NA   | NA   | NA  |
| Previous best        | 1153                | 10366* | 2031  | 680   | 207  | 118                 | 1467  | 186  | 68   | 20  |
| Inv score            | 943                 | 12051  | 1575  | 489   | 110* | 120                 | 2313  | 158* | 56*  | 18  |
| Inv score tuning     | 943                 | 12051  | 1575  | 489   | 110* | 120                 | 2313  | 158* | 56*  | 18  |
| Model 1              | 1282                | 16376  | 2079  | 685   | 192  | 134                 | 1576  | 198  | 91   | 28  |
| Model 33             | 1236                | 14458  | 2081  | 701   | 149  | 104*                | 1317* | 165  | 60   | 17* |
| <i>Third period</i>  |                     |        |       |       |      |                     |       |      |      |     |
| Mean                 | 6747                | 103950 | 13424 | 690   | 409  | 445                 | 9141  | 661  | 115  | 49  |
| Median               | 7735                | 132486 | 14540 | 790   | 538  | 440                 | 8696  | 670  | 115  | 49  |
| Ensemble             | 7436                | 115628 | 14588 | 797   | 560  | 435                 | 8479  | 669  | 115  | 49  |
| Sym trim             | 6952                | 107828 | 13792 | 712   | 418  | 452                 | 9276  | 675  | 114  | 48  |
| Exterior trim        | 6943                | 107979 | 13733 | 727   | 426  | NA                  | NA    | NA   | NA   | NA  |
| Interior trim        | 4374*               | 70222* | 8224* | 747   | 278* | NA                  | NA    | NA   | NA   | NA  |
| Previous best        | 6833                | 104759 | 13106 | 1231  | 402  | 456                 | 8002  | 721  | 150  | 55  |
| Inv score            | 6243                | 83841  | 13147 | 689*  | 327  | 439                 | 8894  | 659  | 114  | 48  |
| Inv score tuning     | 6101                | 84170  | 12660 | 741   | 311  | 420                 | 8058  | 655  | 110* | 47* |
| Model 1              | 16575               | 359767 | 24754 | 3511  | 1271 | 687                 | 15911 | 908  | 188  | 69  |
| Model 33             | 6794                | 101831 | 13186 | 1000  | 607  | 404*                | 7123* | 648* | 120  | 49  |
| <i>Fourth period</i> |                     |        |       |       |      |                     |       |      |      |     |
| Mean                 | 2661                | 22735  | 4868  | 1693  | 243  | 235                 | 2216  | 479  | 91   | 20  |
| Median               | 1848                | 13909* | 3164  | 1443* | 229  | 138*                | 1743  | 221  | 78*  | 19* |
| Ensemble             | 1804*               | 14326  | 2999* | 1450  | 225  | 139                 | 1882  | 216* | 79   | 20  |
| Sym trim             | 2625                | 22735  | 4885  | 1594  | 214* | 138*                | 1708* | 220  | 81   | 19* |
| Exterior trim        | 2714                | 22735  | 5004  | 1724  | 237  | NA                  | NA    | NA   | NA   | NA  |
| Interior trim        | 6939                | 21280  | 18101 | 1638  | 234  | NA                  | NA    | NA   | NA   | NA  |
| Previous best        | 2488                | 30259  | 3625  | 1904  | 301  | 174                 | 2265  | 269  | 108  | 21  |
| Inv score            | 2656                | 24009  | 4791  | 1692  | 228  | 223                 | 2173  | 443  | 91   | 20  |
| Inv score tuning     | 2163                | 24744  | 3191  | 1729  | 240  | 155                 | 2211  | 228  | 95   | 20  |
| Model 1              | 3379                | 18523  | 6319  | 2438  | 488  | 194                 | 2656  | 310  | 102  | 26  |
| Model 33             | 2246                | 14769  | 4131  | 1588  | 283  | 179                 | 3271  | 250  | 82   | 24  |

<sup>a</sup> For each quarter, best method for each column. Lower values are better.
